# Supplementary material for: Impact of lifetime compared to adolescent-onset mental illness on psychosocial employment quality in adulthood: analysis of a nationally representative French cohort
Source: Springer Nature journal article supplement (doi:10.1007/s00420-018-1331-6), 2018-06-30
Supplement: MOESM1 [file 15896956]

Appendix: List of the factors and items used in the 2010 SIP survey to assess psychosocial employment quality.

1) Psychosocial work factors from the job strain model

| **Factors** | **Items** |
| --- | --- |
| Decision latitude (3 items) | I can use my skills fully at work  I have little freedom to decide how to do my work  My work allows me to learn new things |
| Psychological demands (4 items) | My work requires me to work under pressure  I have many things to think about at work  I have an excessive amount of work  I experience time pressure to get tasks done on time at work |
| Social support (1 item) | I have good working relationships with my colleagues at work |

2) Other psychosocial factors

| **Factors** | **Items** |
| --- | --- |
| Reward (1 item) | I receive fair recognition for my efforts at work |
| Emotional demands (1 item) | I have to hide my emotions at work and to appear to be in a happy mood |
| Role conflict (2 items) | I have the means to provide quality work  Sometimes at work I have to do things faster than they should be done |
| Ethical conflict (1 item) | In my work I have to make decisions I personally disagree with (e.g., retrenching colleagues, applying penalties or sanctions, etc.) |
| Role clarity (1 item) | I know what is expected of me at work |
| Meaning of work (2 items) | In my work I can do things I enjoy doing  My work is useful for others |
| Unforeseen and unprepared changes (1 item) | In my work, I experience unforeseen and unprepared changes |
| Predictability (3 items) | I have irregular time schedules difficult to predict  I know in advance what tasks I have to do at work each month  I know in advance which people I will be working with each month |
| Tensions with the public (1 item) | I experience tension with the public in my job |
| Job insecurity (1 item) | I fear losing my job |
| Work-life imbalance (1 item) | I experience difficulty balancing my work with my family commitments |

3) Working time factors

| **Factors** | **Items** |
| --- | --- |
| Long working hours (1 item) | I often work more than 48 hours a week |
| Night work (1 item) | I have to work between midnight and 5am |
| Shift work (1 item) | I have to work on alternating shift |
